# Supplementary material for: Erratum: Sandeep P., et al. A Novel Secure IoT-Based Smart Home Automation System Using a Wireless Sensor Network. Sensors 2017, 17, 69
Source: MDPI journal article supplement (doi:10.3390/s17030606), 2017-03-16
Supplement: s1 [file s1]

Energy Consumption Comparison with Hash Functions

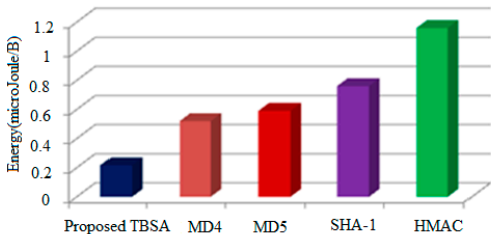

(a)

Energy Consumption with Symmetric Ciphers

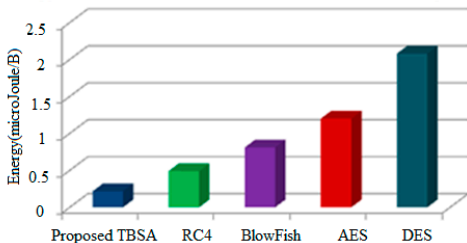

(b)
