# Supplementary material for: Erratum: Sandeep P., et al. A Novel Secure IoT-Based Smart Home Automation System Using a Wireless Sensor Network. Sensors 2017, 17, 69
Source: MDPI journal article supplement (doi:10.3390/s17030606), 2017-03-16
Supplement: s1 [file s1]

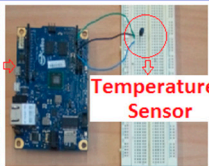

Temperature  
Sensor

Sensor Node 1

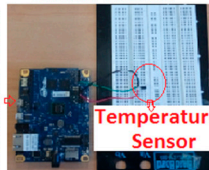

Temperature  
Sensor

Sensor Node 2

Tier 1

Wi-Fi  
Medium

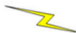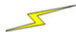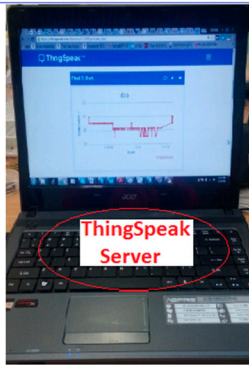

Tier 2

Wi-Fi  
Medium

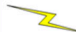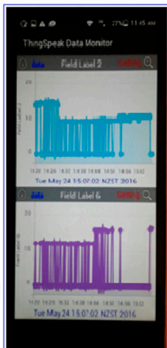

Destination Node

Tier 3
