# Supplementary figures and images for: Erratum: Sandeep P., et al. A Novel Secure IoT-Based Smart Home Automation System Using a Wireless Sensor Network. Sensors 2017, 17, 69
Source: MDPI journal article supplement (doi:10.3390/s17030606), 2017-03-16

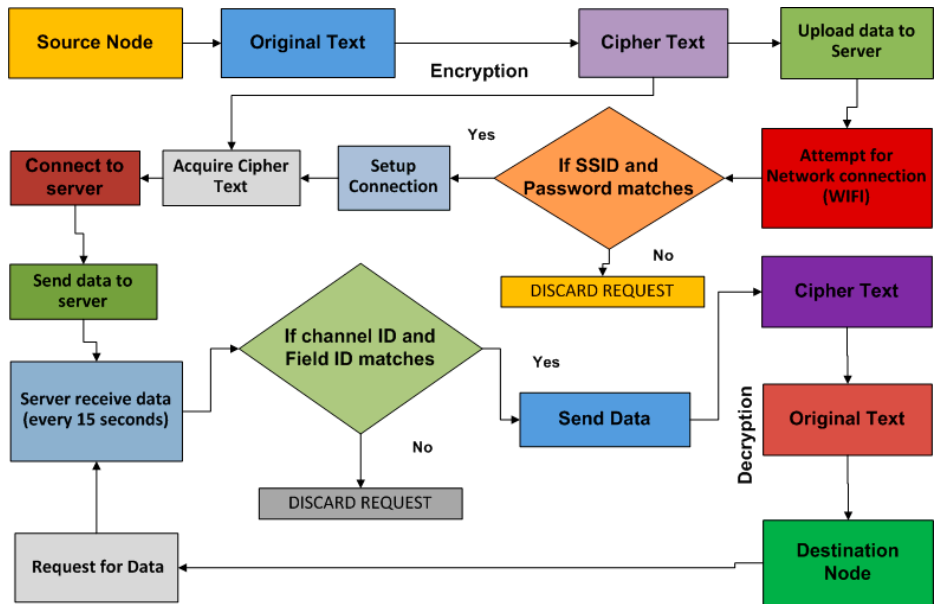

Supplement: s1 [file s1]

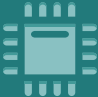

*sensors*

Supplement: s1 [file s1]

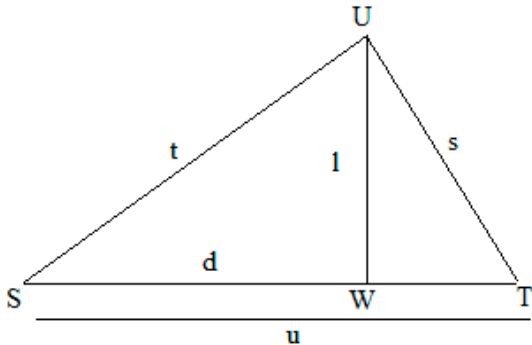

Supplement: s1 [file s1]

Sensor Node 1

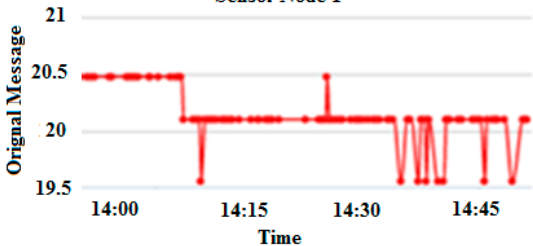

Sensor Node 2

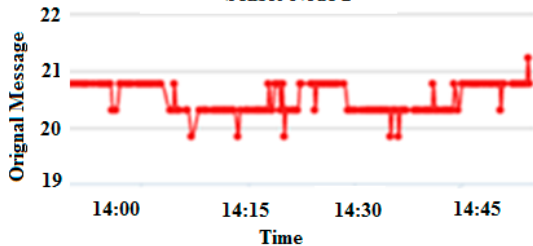

Supplement: s1 [file s1]

**Sensor Node 1**

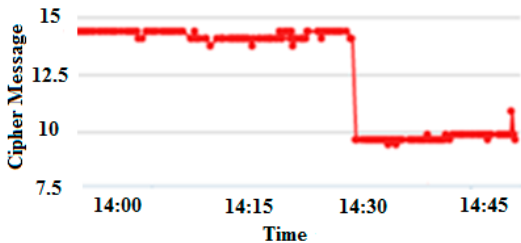

**Sensor Node 2**

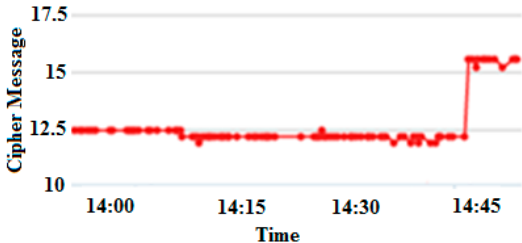

Supplement: s1 [file s1]

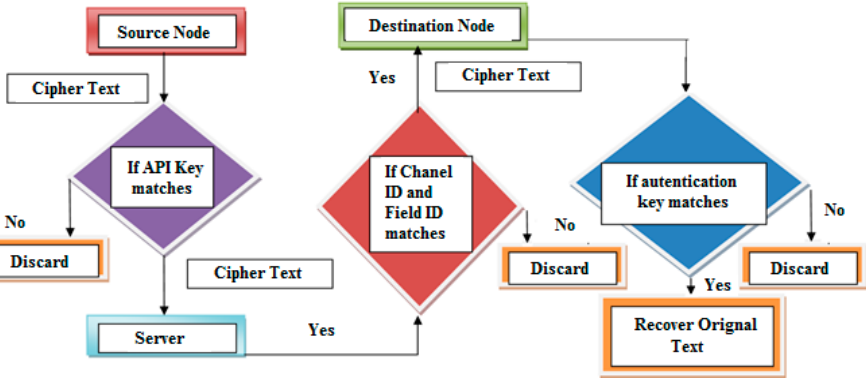

**Authentication Level 1**

**Authentication Level 2**

**Authentication Level 3**

Supplement: s1 [file s1]

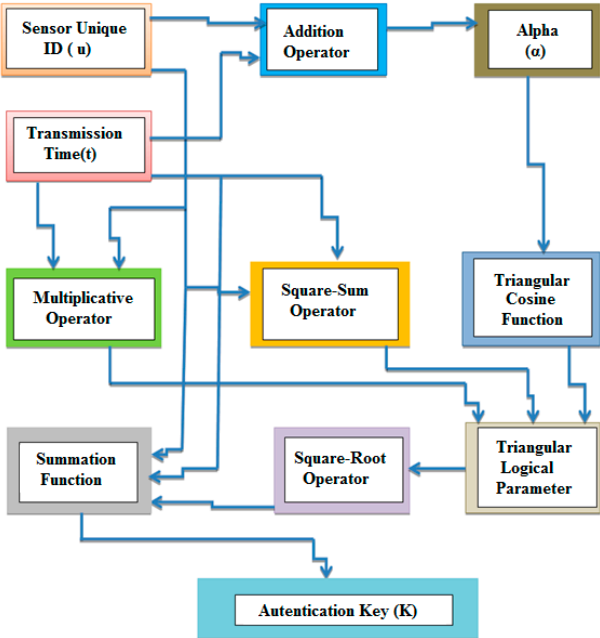

Supplement: s1 [file s1]

## Temperature Sensor

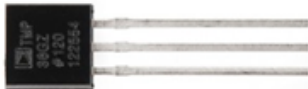

(a)

## Wi-Fi Module

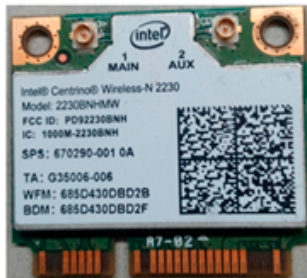

(b)

## Intel Galileo Board

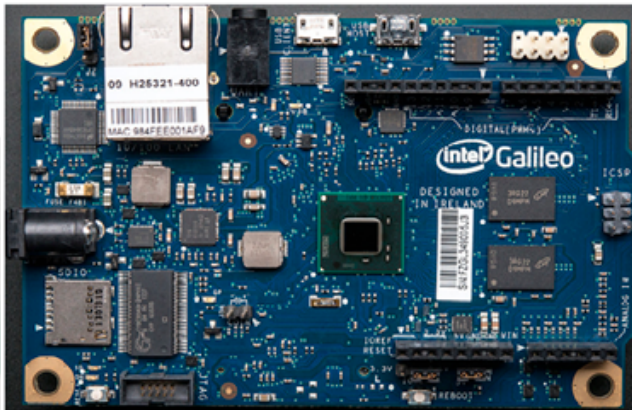

(c)

Supplement: s1 [file s1]

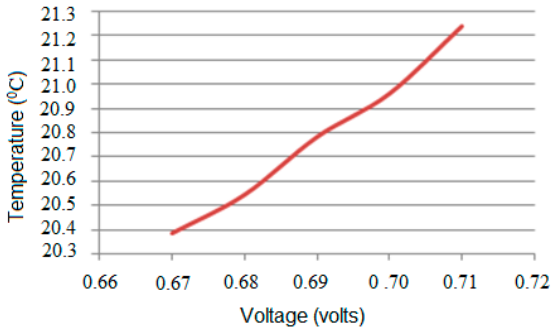

Supplement: s1 [file s1]

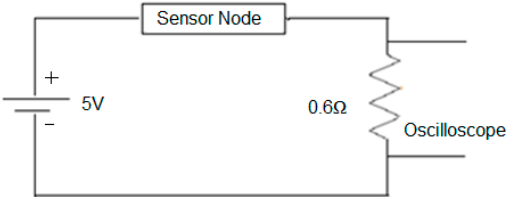

Supplement: s1 [file s1]

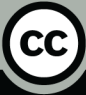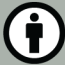

BY

Supplement: s1 [file s1]

Energy Consumption Comparison with Security Methods for WSNs

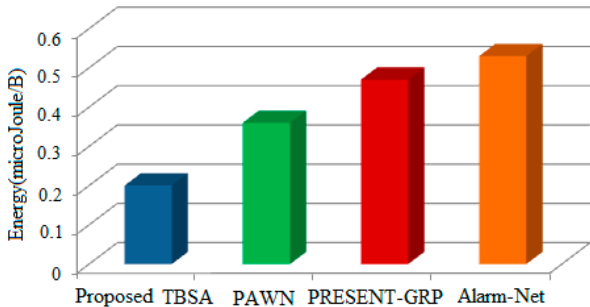

Supplement: s1 [file s1]
